# Supplementary material for: Critical areas for sea turtles in Northeast Brazil: a participatory approach for a data-poor context
Source: PeerJ. 2024 Mar 25;12:e17109. doi: 10.7717/peerj.17109 (PMC10977088; doi:10.7717/peerj.17109)
Supplement: Supplemental Information 3 [file peerj-12-17109-s003.xlsx]

## Sheet: Sightings
Fisher	Date	Time	Individuals	Folk name	Common name	Species	Biology	City	Fishing community	Route file
1	2018-07-11	05:44:00	1	Tartaruga-verde	Green turtle	Chelonia mydas	adult	Cabedelo	Ponta de Matos	CA1_2307
1	2018-07-12	06:11:00	1	Tartaruga-verde	Green turtle	Chelonia mydas	adult	Cabedelo	Ponta de Matos	CA1_2307
1	2018-07-12	06:39:00	1	Tartaruga-verde	Green turtle	Chelonia mydas	adult	Cabedelo	Ponta de Matos	CA1_2307
1	2018-07-12	07:15:00	1	Tartaruga-de-pente	Hawksbill turtle	Eretmochelys imbricata	juvenile	Cabedelo	Ponta de Matos	CA1_2307
1	2018-07-19	06:24:00	1	Tartaruga-verde	Green turtle	Chelonia mydas	adult	Cabedelo	Ponta de Matos	CA1_2307
1	2018-07-19	06:12:00	1	Tartaruga-verde	Green turtle	Chelonia mydas	hatchling	Cabedelo	Ponta de Matos	CA1_2307
1	2018-07-20	06:55:00	1	Tartaruga-verde	Green turtle	Chelonia mydas	not informed	Cabedelo	Ponta de Matos	CA1_2307
1	2018-07-21	06:05:00	1	Tartaruga-verde	Green turtle	Chelonia mydas	not informed	Cabedelo	Ponta de Matos	CA1_2307
1	2018-07-22	06:02:00	1	Tartaruga-verde	Green turtle	Chelonia mydas	not informed	Cabedelo	Ponta de Matos	CA1_2307
1	2018-07-22	06:48:00	2	Tartaruga-verde	Green turtle	Chelonia mydas	not informed	Cabedelo	Ponta de Matos	CA1_2307
1	2018-07-22	08:02:00	1	Tartaruga-de-pente	Hawksbill turtle	Eretmochelys imbricata	juvenile	Cabedelo	Ponta de Matos	CA1_2307
3	2018-07-14	08:12:00	1	"tartaruga"	Turtle	N/A	not informed	Cabedelo	Ponta de Matos	CA3_0208
3	2018-07-14	08:45:00	1	"tartaruga"	Turtle	N/A	not informed	Cabedelo	Ponta de Matos	CA3_0208
3	2018-07-14	09:38:00	2	"tartaruga"	Turtle	N/A	not informed	Cabedelo	Ponta de Matos	CA3_0208
3	2018-07-14	09:41:00	4	"tartaruga"	Turtle	N/A	not informed	Cabedelo	Ponta de Matos	CA3_0208
3	2018-07-24	15:19:00	1	"tartaruga"	Turtle	N/A	not informed	Cabedelo	Ponta de Matos	CA3_0208
3	2018-07-24	15:46:00	1	"tartaruga"	Turtle	N/A	not informed	Cabedelo	Ponta de Matos	CA3_0208
3	2018-07-24	15:58:00	1	"tartaruga"	Turtle	N/A	not informed	Cabedelo	Ponta de Matos	CA3_0208
3	2018-07-24	16:13:00	1	"tartaruga"	Turtle	N/A	not informed	Cabedelo	Ponta de Matos	CA3_0208
3	2018-07-24	16:51:00	1	"tartaruga"	Turtle	N/A	not informed	Cabedelo	Ponta de Matos	CA3_0208
3	2018-07-24	16:53:00	1	"tartaruga"	Turtle	N/A	not informed	Cabedelo	Ponta de Matos	CA3_0208
3	2018-07-24	16:57:00	1	"tartaruga"	Turtle	N/A	not informed	Cabedelo	Ponta de Matos	CA3_0208
2	2018-07-15	07:55:00	1	Tartaruga-cabeçuda	Loggerhead turtle	Caretta caretta	not informed	Cabedelo	Ponta de Matos	CA2_0208
2	2018-07-15	12:20:00	1	Tartaruga-verde	Green turtle	Chelonia mydas	not informed	Cabedelo	Ponta de Matos	CA2_0208
2	2018-07-15	13:00:00	1	Tartaruga-verde	Green turtle	Chelonia mydas	not informed	Cabedelo	Ponta de Matos	CA2_0208
2	2018-07-24	13:08:00	1	Tartaruga-verde	Green turtle	Chelonia mydas	not informed	Cabedelo	Ponta de Matos	CA2_0208
2	2018-07-24	13:33:00	1	Tartaruga-cabeçuda	Loggerhead turtle	Caretta caretta	not informed	Cabedelo	Ponta de Matos	CA2_0208
2	2018-07-24	16:24:00	1	Tartaruga-verde	Green turtle	Chelonia mydas	not informed	Cabedelo	Ponta de Matos	CA2_0208
2	2018-07-24	17:27:00	1	Tartaruga-verde	Green turtle	Chelonia mydas	not informed	Cabedelo	Ponta de Matos	CA2_0208
1	2018-07-31	07:35:00	1	"tartaruga"	Turtle	N/A	adult	Cabedelo	Ponta de Matos	CA1_1808
1	2018-07-31	07:40:00	1	"tartaruga"	Turtle	N/A	juvenile	Cabedelo	Ponta de Matos	CA1_1808
1	2018-07-31	07:53:00	1	Tartaruga-verde	Green turtle	Chelonia mydas	adult	Cabedelo	Ponta de Matos	CA1_1808
1	2018-07-31	08:15:00	1	Tartaruga-verde	Green turtle	Chelonia mydas	juvenile	Cabedelo	Ponta de Matos	CA1_1808
1	2018-07-31	09:43:00	1	Tartaruga-verde	Green turtle	Chelonia mydas	juvenile	Cabedelo	Ponta de Matos	CA1_1808
1	2018-07-31	09:54:00	1	Tartaruga-verde	Green turtle	Chelonia mydas	juvenile	Cabedelo	Ponta de Matos	CA1_1808
1	2018-07-31	09:59:00	1	Tartaruga-verde	Green turtle	Chelonia mydas	juvenile	Cabedelo	Ponta de Matos	CA1_1808
1	2018-07-31	10:02:00	1	Tartaruga-verde	Green turtle	Chelonia mydas	juvenile	Cabedelo	Ponta de Matos	CA1_1808
1	2018-07-31	10:06:00	1	Tartaruga-verde	Green turtle	Chelonia mydas	juvenile	Cabedelo	Ponta de Matos	CA1_1808
1	2018-07-31	10:08:00	4	Tartaruga-verde	Green turtle	Chelonia mydas	not informed	Cabedelo	Ponta de Matos	CA1_1808
1	2018-07-31	10:16:00	2	Tartaruga-verde	Green turtle	Chelonia mydas	not informed	Cabedelo	Ponta de Matos	CA1_1808
1	2018-07-31	10:17:00	2	Tartaruga-cabeçuda	Loggerhead turtle	Caretta caretta	adult	Cabedelo	Ponta de Matos	CA1_1808
7	2018-07-27	09:23:00	1	Tartaruga-verde	Green turtle	Chelonia mydas	not informed	Conde	Jacumã	JA7_1808
9	2018-08-03	13:20:00	1	"tartaruga"	Turtle	N/A	not informed	Conde	Jacumã	JA9_0808
1	2018-08-02	06:16:00	1	Tartaruga-verde	Green turtle	Chelonia mydas	adult	Cabedelo	Ponta de Matos	CA1_1808
1	2018-08-04	05:48:00	1	Tartaruga-verde	Green turtle	Chelonia mydas	adult	Cabedelo	Ponta de Matos	CA1_1808
1	2018-08-07	06:41:00	1	Tartaruga-de-pente	Hawksbill turtle	Eretmochelys imbricata	adult	Cabedelo	Ponta de Matos	CA1_1808
1	2018-08-07	06:41:00	1	Tartaruga-verde	Green turtle	Chelonia mydas	not informed	Cabedelo	Ponta de Matos	CA1_1808
1	2018-08-07	16:33:00	1	Tartaruga-verde	Green turtle	Chelonia mydas	juvenile	Cabedelo	Ponta de Matos	CA1_1808
1	2018-08-07	17:13:00	1	Tartaruga-verde	Green turtle	Chelonia mydas	juvenile	Cabedelo	Ponta de Matos	CA1_1808
1	2018-08-07	17:22:00	1	Tartaruga-verde	Green turtle	Chelonia mydas	not informed	Cabedelo	Ponta de Matos	CA1_1808
1	2018-08-07	17:22:00	1	Tartaruga-de-pente	Hawksbill turtle	Eretmochelys imbricata	adult	Cabedelo	Ponta de Matos	CA1_1808
1	2018-08-07	17:44:00	2	Tartaruga-verde	Green turtle	Chelonia mydas	juvenile	Cabedelo	Ponta de Matos	CA1_1808
1	2018-08-14	10:17:00	1	Tartaruga-verde	Green turtle	Chelonia mydas	adult	Cabedelo	Ponta de Matos	CA1_2408
1	2018-08-14	10:40:00	1	Tartaruga-verde	Green turtle	Chelonia mydas	juvenile	Cabedelo	Ponta de Matos	CA1_2408
1	2018-08-20	06:17:00	1	Tartaruga-verde	Green turtle	Chelonia mydas	adult	Cabedelo	Ponta de Matos	CA1_2408
1	2018-08-20	06:30:00	1	Tartaruga-verde	Green turtle	Chelonia mydas	adult	Cabedelo	Ponta de Matos	CA1_2408
1	2018-08-20	06:44:00	1	Tartaruga-verde	Green turtle	Chelonia mydas	adult	Cabedelo	Ponta de Matos	CA1_2408
1	2018-08-20	08:40:00	2	Tartaruga-verde	Green turtle	Chelonia mydas	adult	Cabedelo	Ponta de Matos	CA1_2408
1	2018-08-22	09:30:00	2	"tartaruga"	Turtle	N/A	not informed	Cabedelo	Ponta de Matos	CA1_2408
1	2018-08-22	09:36:00	1	"tartaruga"	Turtle	N/A	not informed	Cabedelo	Ponta de Matos	CA1_2408
1	2018-08-22	10:13:00	2	"tartaruga"	Turtle	N/A	not informed	Cabedelo	Ponta de Matos	CA1_2408
1	2018-08-22	10:18:00	1	"tartaruga"	Turtle	N/A	not informed	Cabedelo	Ponta de Matos	CA1_2408
1	2018-08-22	10:21:00	2	Tartaruga-verde	Green turtle	Chelonia mydas	not informed	Cabedelo	Ponta de Matos	CA1_2408
1	2018-08-22	10:37:00	1	Tartaruga-verde	Green turtle	Chelonia mydas	not informed	Cabedelo	Ponta de Matos	CA1_2408
1	2018-08-22	10:38:00	1	Tartaruga-verde	Green turtle	Chelonia mydas	juvenile	Cabedelo	Ponta de Matos	CA1_2408
1	2018-08-22	10:38:00	1	Tartaruga-verde	Green turtle	Chelonia mydas	adult male	Cabedelo	Ponta de Matos	CA1_2408
1	2018-08-22	10:45:00	1	Tartaruga-verde	Green turtle	Chelonia mydas	juvenile	Cabedelo	Ponta de Matos	CA1_2408
1	2018-08-22	10:45:00	1	Tartaruga-verde	Green turtle	Chelonia mydas	adult male	Cabedelo	Ponta de Matos	CA1_2408
3	2018-08-20	15:45:00	1	"tartaruga"	Turtle	N/A	not informed	Cabedelo	Ponta de Matos	CA3_2408
3	2018-08-20	15:58:00	1	"tartaruga"	Turtle	N/A	not informed	Cabedelo	Ponta de Matos	CA3_2408
3	2018-08-20	16:00:00	1	"tartaruga"	Turtle	N/A	not informed	Cabedelo	Ponta de Matos	CA3_2408
3	2018-08-20	16:20:00	1	"tartaruga"	Turtle	N/A	not informed	Cabedelo	Ponta de Matos	CA3_2408
3	2018-08-20	16:36:00	1	"tartaruga"	Turtle	N/A	not informed	Cabedelo	Ponta de Matos	CA3_2408
3	2018-08-20	16:41:00	1	"tartaruga"	Turtle	N/A	not informed	Cabedelo	Ponta de Matos	CA3_2408
3	2018-08-20	16:30:00	1	"tartaruga"	Turtle	N/A	not informed	Cabedelo	Ponta de Matos	CA3_2408
7	2018-08-13	16:49:00	1	"tartaruga"	Turtle	N/A	not informed	Conde	Jacumã	JA7_2608
7	2018-08-13	15:19:00	1	"tartaruga"	Turtle	N/A	not informed	Conde	Jacumã	JA7_2608
7	2018-08-13	16:40:00	1	"tartaruga"	Turtle	N/A	not informed	Conde	Jacumã	JA7_2608
7	2018-08-13	13:16:00	1	"tartaruga"	Turtle	N/A	not informed	Conde	Jacumã	JA7_2608
7	2018-08-13	16:57:00	1	"tartaruga"	Turtle	N/A	not informed	Conde	Jacumã	JA7_2608
7	2018-08-14	15:30:00	1	"tartaruga"	Turtle	N/A	not informed	Conde	Jacumã	JA7_2608
7	2018-08-22	09:05:00	1	"tartaruga"	Turtle	N/A	not informed	Conde	Jacumã	JA7_2608
6	2018-08-22	13:38:00	1	Tartaruga-verde	Green turtle	Chelonia mydas	juvenile	João Pessoa	Penha	PE6_3108
6	2018-08-22	13:43:00	1	Tartaruga-verde	Green turtle	Chelonia mydas	juvenile	João Pessoa	Penha	PE6_3109
6	2018-08-22	15:10:00	1	Tartaruga-cabeçuda	Loggerhead turtle	Caretta caretta	adult	João Pessoa	Penha	PE6_3110
6	2018-08-22	16:30:00	1	Tartaruga-verde	Green turtle	Chelonia mydas	juvenile	João Pessoa	Penha	PE6_3111
6	2018-08-23	10:59:00	1	Tartaruga-cabeçuda	Loggerhead turtle	Caretta caretta	adult	João Pessoa	Penha	PE6_3112
6	2018-08-23	12:41:00	1	Tartaruga-verde	Green turtle	Chelonia mydas	juvenile	João Pessoa	Penha	PE6_3113
6	2018-08-23	13:05:00	1	Tartaruga-verde	Green turtle	Chelonia mydas	juvenile	João Pessoa	Penha	PE6_3114
9	2018-08-14	14:15:00	1	"tartaruga"	Turtle	N/A	not informed	Conde	Jacumã	JA9_1109
3	2018-08-25	13:24:00	1	"tartaruga"	Turtle	N/A	not informed	Cabedelo	Ponta de Matos	CA3_1309
3	2018-08-25	13:27:00	1	"tartaruga"	Turtle	N/A	not informed	Cabedelo	Ponta de Matos	CA3_1309
3	2018-08-25	13:28:00	1	"tartaruga"	Turtle	N/A	not informed	Cabedelo	Ponta de Matos	CA3_1309
3	2018-08-25	13:31:00	1	"tartaruga"	Turtle	N/A	not informed	Cabedelo	Ponta de Matos	CA3_1309
3	2018-08-25	13:34:00	1	"tartaruga"	Turtle	N/A	not informed	Cabedelo	Ponta de Matos	CA3_1309
3	2018-08-25	13:35:00	1	"tartaruga"	Turtle	N/A	not informed	Cabedelo	Ponta de Matos	CA3_1309
3	2018-08-25	13:38:00	1	"tartaruga"	Turtle	N/A	not informed	Cabedelo	Ponta de Matos	CA3_1309
3	2018-08-25	13:47:00	1	"tartaruga"	Turtle	N/A	not informed	Cabedelo	Ponta de Matos	CA3_1309
3	2018-08-25	13:49:00	1	"tartaruga"	Turtle	N/A	not informed	Cabedelo	Ponta de Matos	CA3_1309
3	2018-08-25	13:52:00	1	"tartaruga"	Turtle	N/A	not informed	Cabedelo	Ponta de Matos	CA3_1309
3	2018-08-25	14:00:00	1	"tartaruga"	Turtle	N/A	not informed	Cabedelo	Ponta de Matos	CA3_1309
3	2018-08-25	14:03:00	1	"tartaruga"	Turtle	N/A	not informed	Cabedelo	Ponta de Matos	CA3_1309
3	2018-08-25	14:06:00	1	"tartaruga"	Turtle	N/A	not informed	Cabedelo	Ponta de Matos	CA3_1309
3	2018-08-25	14:09:00	1	"tartaruga"	Turtle	N/A	not informed	Cabedelo	Ponta de Matos	CA3_1309
3	2018-08-25	14:13:00	1	"tartaruga"	Turtle	N/A	not informed	Cabedelo	Ponta de Matos	CA3_1309
1	2018-08-26	08:30:00	1	Tartaruga-verde	Green turtle	Chelonia mydas	not informed	Cabedelo	Ponta de Matos	CA1_1309
1	2018-08-26	09:04:00	1	Tartaruga-verde	Green turtle	Chelonia mydas	not informed	Cabedelo	Ponta de Matos	CA1_1309
1	2018-08-31	07:48:00	1	Tartaruga-verde	Green turtle	Chelonia mydas	not informed	Cabedelo	Ponta de Matos	CA1_1309
1	2018-08-31	08:05:00	1	Tartaruga-verde	Green turtle	Chelonia mydas	not informed	Cabedelo	Ponta de Matos	CA1_1309
1	2018-08-31	08:10:00	1	Tartaruga-verde	Green turtle	Chelonia mydas	not informed	Cabedelo	Ponta de Matos	CA1_1309
1	2018-08-31	08:11:00	1	Tartaruga-verde	Green turtle	Chelonia mydas	not informed	Cabedelo	Ponta de Matos	CA1_1309
1	2018-08-31	08:15:00	1	Tartaruga-verde	Green turtle	Chelonia mydas	not informed	Cabedelo	Ponta de Matos	CA1_1309
1	2018-08-31	08:20:00	1	Tartaruga-verde	Green turtle	Chelonia mydas	not informed	Cabedelo	Ponta de Matos	CA1_1309
1	2018-08-31	08:21:00	1	Tartaruga-verde	Green turtle	Chelonia mydas	not informed	Cabedelo	Ponta de Matos	CA1_1309
1	2018-08-31	08:24:00	1	Tartaruga-verde	Green turtle	Chelonia mydas	not informed	Cabedelo	Ponta de Matos	CA1_1309
1	2018-08-31	08:30:00	1	Tartaruga-verde	Green turtle	Chelonia mydas	not informed	Cabedelo	Ponta de Matos	CA1_1309
1	2018-08-31	08:50:00	1	Tartaruga-verde	Green turtle	Chelonia mydas	not informed	Cabedelo	Ponta de Matos	CA1_1309
1	2018-08-31	09:21:00	1	Tartaruga-verde	Green turtle	Chelonia mydas	not informed	Cabedelo	Ponta de Matos	CA1_1309
5	2018-09-24	14:54:00	1	Tartaruga-verde	Green turtle	Chelonia mydas	adult	João Pessoa	Penha	PE5_3009
5	2018-09-24	15:04:00	1	Tartaruga-de-pente	Hawksbill turtle	Eretmochelys imbricata	adult	João Pessoa	Penha	PE5_3009
5	2018-09-24	15:10:00	1	Tartaruga-verde	Green turtle	Chelonia mydas	adult	João Pessoa	Penha	PE5_3009
5	2018-09-24	15:19:00	1	Tartaruga-verde	Green turtle	Chelonia mydas	adult	João Pessoa	Penha	PE5_3009
5	2018-09-25	14:10:00	1	Tartaruga-de-pente	Hawksbill turtle	Eretmochelys imbricata	adult	João Pessoa	Penha	PE5_3009
5	2018-09-25	15:30:00	1	Tartaruga-verde	Green turtle	Chelonia mydas	adult	João Pessoa	Penha	PE5_3009
5	2018-09-25	15:50:00	1	Tartaruga-de-pente	Hawksbill turtle	Eretmochelys imbricata	adult	João Pessoa	Penha	PE5_3009
5	2018-09-27	14:05:00	1	Tartaruga-verde	Green turtle	Chelonia mydas	juvenile	João Pessoa	Penha	PE5_3009
5	2018-09-27	14:40:00	1	Tartaruga-cabeçuda	Loggerhead turtle	Caretta caretta	adult	João Pessoa	Penha	PE5_3009
5	2018-09-28	16:45:00	2	Tartaruga-verde	Green turtle	Chelonia mydas	adult	João Pessoa	Penha	PE5_3009
7	2018-09-07	08:27:00	1	"tartaruga"	Turtle	N/A	not informed	Conde	Jacumã	JA7_2309
7	2018-09-07	14:02:00	1	Tartaruga-verde	Green turtle	Chelonia mydas	not informed	Conde	Jacumã	JA7_2309
7	2018-09-07	14:16:00	1	"tartaruga"	Turtle	N/A	not informed	Conde	Jacumã	JA7_2309
7	2018-09-07	17:06:00	1	"tartaruga"	Turtle	N/A	not informed	Conde	Jacumã	JA7_2309
7	2018-09-21	06:21:00	1	"tartaruga"	Turtle	N/A	not informed	Conde	Jacumã	JA7_2309
7	2018-09-21	06:47:00	1	"tartaruga"	Turtle	N/A	not informed	Conde	Jacumã	JA7_2309
7	2018-09-21	07:08:00	1	"tartaruga"	Turtle	N/A	not informed	Conde	Jacumã	JA7_2309
7	2018-09-21	10:43:00	1	"tartaruga"	Turtle	N/A	not informed	Conde	Jacumã	JA7_2309
7	2018-09-21	14:10:00	1	"tartaruga"	Turtle	N/A	not informed	Conde	Jacumã	JA7_2309
7	2018-09-21	06:00:00	1	"tartaruga"	Turtle	N/A	not informed	Conde	Jacumã	JA7_2309
7	2018-09-21	10:20:00	1	"tartaruga"	Turtle	N/A	not informed	Conde	Jacumã	JA7_2309
8	2018-09-22	11:25:00	1	Tartaruga-verde	Green turtle	Chelonia mydas	not informed	Conde	Jacumã	JA8_2309
1	2018-10-02	05:05:00	1	Tartaruga-verde	Green turtle	Chelonia mydas	adult	Cabedelo	Ponta de Matos	CA1_2710
1	2018-10-02	05:23:00	1	Tartaruga-verde	Green turtle	Chelonia mydas	adult	Cabedelo	Ponta de Matos	CA1_2710
1	2018-10-03	05:04:00	1	Tartaruga-verde	Green turtle	Chelonia mydas	adult	Cabedelo	Ponta de Matos	CA1_2710
1	2018-10-03	05:23:00	1	Tartaruga-verde	Green turtle	Chelonia mydas	adult	Cabedelo	Ponta de Matos	CA1_2710
3	2018-10-10	15:16:00	1	"tartaruga"	Turtle	N/A	not informed	Cabedelo	Ponta de Matos	CA3_2710
3	2018-10-10	15:19:00	1	"tartaruga"	Turtle	N/A	not informed	Cabedelo	Ponta de Matos	CA3_2710
3	2018-10-10	15:21:00	1	"tartaruga"	Turtle	N/A	not informed	Cabedelo	Ponta de Matos	CA3_2710
3	2018-10-10	15:24:00	1	"tartaruga"	Turtle	N/A	not informed	Cabedelo	Ponta de Matos	CA3_2710
3	2018-10-10	15:32:00	2	"tartaruga"	Turtle	N/A	not informed	Cabedelo	Ponta de Matos	CA3_2710
3	2018-10-10	15:36:00	1	"tartaruga"	Turtle	N/A	not informed	Cabedelo	Ponta de Matos	CA3_2710
3	2018-10-10	15:37:00	1	"tartaruga"	Turtle	N/A	not informed	Cabedelo	Ponta de Matos	CA3_2710
3	2018-10-10	15:42:00	1	"tartaruga"	Turtle	N/A	not informed	Cabedelo	Ponta de Matos	CA3_2710
3	2018-10-10	15:47:00	1	"tartaruga"	Turtle	N/A	not informed	Cabedelo	Ponta de Matos	CA3_2710
3	2018-10-10	15:52:00	2	"tartaruga"	Turtle	N/A	not informed	Cabedelo	Ponta de Matos	CA3_2710
3	2018-10-10	16:01:00	1	"tartaruga"	Turtle	N/A	not informed	Cabedelo	Ponta de Matos	CA3_2710
3	2018-10-10	16:03:00	1	"tartaruga"	Turtle	N/A	not informed	Cabedelo	Ponta de Matos	CA3_2710
3	2018-10-10	16:04:00	1	"tartaruga"	Turtle	N/A	not informed	Cabedelo	Ponta de Matos	CA3_2710
3	2018-10-10	16:05:00	1	"tartaruga"	Turtle	N/A	not informed	Cabedelo	Ponta de Matos	CA3_2710
3	2018-10-10	16:09:00	1	"tartaruga"	Turtle	N/A	not informed	Cabedelo	Ponta de Matos	CA3_2710
3	2018-10-10	16:10:00	1	"tartaruga"	Turtle	N/A	not informed	Cabedelo	Ponta de Matos	CA3_2710
3	2018-10-10	16:15:00	1	"tartaruga"	Turtle	N/A	not informed	Cabedelo	Ponta de Matos	CA3_2710
3	2018-10-10	16:18:00	1	"tartaruga"	Turtle	N/A	not informed	Cabedelo	Ponta de Matos	CA3_2710
3	2018-10-10	16:25:00	1	"tartaruga"	Turtle	N/A	not informed	Cabedelo	Ponta de Matos	CA3_2710
3	2018-10-10	16:27:00	1	"tartaruga"	Turtle	N/A	not informed	Cabedelo	Ponta de Matos	CA3_2710
3	2018-10-10	16:30:00	1	"tartaruga"	Turtle	N/A	not informed	Cabedelo	Ponta de Matos	CA3_2710
3	2018-10-10	16:36:00	1	"tartaruga"	Turtle	N/A	not informed	Cabedelo	Ponta de Matos	CA3_2710
3	2018-10-10	16:40:00	1	"tartaruga"	Turtle	N/A	not informed	Cabedelo	Ponta de Matos	CA3_2710
5	2018-10-15	15:20:00	1	Tartaruga-verde	Green turtle	Chelonia mydas	adult	João Pessoa	Penha	PE5_2710
5	2018-10-15	16:42:00	1	Tartaruga-cabeçuda	Loggerhead turtle	Caretta caretta	adult	João Pessoa	Penha	PE5_2710
5	2018-10-15	16:47:00	1	Tartaruga-cabeçuda	Loggerhead turtle	Caretta caretta	juvenile	João Pessoa	Penha	PE5_2710
5	2018-10-17	05:53:00	1	Tartaruga-verde	Green turtle	Chelonia mydas	juvenile	João Pessoa	Penha	PE5_2710
5	2018-10-24	09:45:00	2	Tartaruga-cabeçuda	Loggerhead turtle	Caretta caretta	adult	João Pessoa	Penha	PE5_2710
5	2018-10-24	09:45:00	1	Tartaruga-verde	Green turtle	Chelonia mydas	juvenile	João Pessoa	Penha	PE5_2710
5	2018-10-24	09:48:00	1	Tartaruga-verde	Green turtle	Chelonia mydas	juvenile	João Pessoa	Penha	PE5_2710
5	2018-10-24	09:50:00	1	Tartaruga-cabeçuda	Loggerhead turtle	Caretta caretta	juvenile	João Pessoa	Penha	PE5_2710
5	2018-10-24	10:01:00	1	Tartaruga-verde	Green turtle	Chelonia mydas	adult	João Pessoa	Penha	PE5_2710
5	2018-10-24	10:14:00	1	Tartaruga-verde	Green turtle	Chelonia mydas	juvenile	João Pessoa	Penha	PE5_2710
5	2018-10-24	10:19:00	1	Tartaruga-cabeçuda	Loggerhead turtle	Caretta caretta	adult	João Pessoa	Penha	PE5_2710
5	2018-10-24	10:40:00	1	Tartaruga-verde	Green turtle	Chelonia mydas	juvenile	João Pessoa	Penha	PE5_2710
7	2018-09-21	06:00:00	1	Tartaruga-verde	Green turtle	Chelonia mydas	not informed	Conde	Jacumã	JA7_2710
7	2018-09-21	10:21:00	1	"tartaruga"	Turtle	N/A	not informed	Conde	Jacumã	JA7_2710
7	2018-10-09	14:10:00	1	"tartaruga"	Turtle	N/A	not informed	Conde	Jacumã	JA7_2710
7	2018-10-09	14:28:00	1	Tartaruga-verde	Green turtle	Chelonia mydas	not informed	Conde	Jacumã	JA7_2710
7	2018-10-09	14:29:00	1	"tartaruga"	Turtle	N/A	not informed	Conde	Jacumã	JA7_2710
7	2018-10-10	14:14:00	1	Tartaruga-verde	Green turtle	Chelonia mydas	not informed	Conde	Jacumã	JA7_2710
7	2018-10-11	07:35:00	1	"tartaruga"	Turtle	N/A	not informed	Conde	Jacumã	JA7_2710
7	2018-10-11	07:00:00	1	"tartaruga"	Turtle	N/A	not informed	Conde	Jacumã	JA7_2710
7	2018-10-11	07:02:00	1	Tartaruga-verde	Green turtle	Chelonia mydas	not informed	Conde	Jacumã	JA7_2710
7	2018-10-11	07:29:00	1	"tartaruga"	Turtle	N/A	not informed	Conde	Jacumã	JA7_2710
7	2018-10-13	11:52:00	1	"tartaruga"	Turtle	N/A	not informed	Conde	Jacumã	JA7_2710
8	2018-10-22	10:52:00	1	Tartaruga-verde	Green turtle	Chelonia mydas	not informed	Conde	Jacumã	JA8_2309
8	2018-10-22	11:00:00	1	Tartaruga-verde	Green turtle	Chelonia mydas	not informed	Conde	Jacumã	JA8_2309
8	2018-10-22	11:03:00	2	"tartaruga"	Turtle	N/A	not informed	Conde	Jacumã	JA8_2309
8	2018-10-22	11:05:00	3	"tartaruga"	Turtle	N/A	not informed	Conde	Jacumã	JA8_2309
8	2018-10-22	11:07:00	1	"tartaruga"	Turtle	N/A	not informed	Conde	Jacumã	JA8_2309
8	2018-10-22	11:08:00	2	"tartaruga"	Turtle	N/A	not informed	Conde	Jacumã	JA8_2309
8	2018-10-22	11:11:00	1	"tartaruga"	Turtle	N/A	not informed	Conde	Jacumã	JA8_2309
8	2018-10-22	11:44:00	1	Tartaruga-verde	Green turtle	Chelonia mydas	not informed	Conde	Jacumã	JA8_2309
8	2018-10-22	12:04:00	1	Tartaruga-verde	Green turtle	Chelonia mydas	not informed	Conde	Jacumã	JA8_2309
8	2018-11-05	07:30:00	1	"tartaruga"	Turtle	N/A	not informed	Conde	Jacumã	saidas_5_8_NOV
8	2018-11-05	08:01:00	1	"tartaruga"	Turtle	N/A	not informed	Conde	Jacumã	saidas_5_8_NOV
8	2018-11-05	08:04:00	1	"tartaruga"	Turtle	N/A	not informed	Conde	Jacumã	saidas_5_8_NOV
8	2018-11-05	08:06:00	3	"tartaruga"	Turtle	N/A	not informed	Conde	Jacumã	saidas_5_8_NOV
8	2018-11-05	08:08:00	1	"tartaruga"	Turtle	N/A	not informed	Conde	Jacumã	saidas_5_8_NOV
8	2018-11-05	08:13:00	1	"tartaruga"	Turtle	N/A	not informed	Conde	Jacumã	saidas_5_8_NOV
8	2018-11-05	08:16:00	1	"tartaruga"	Turtle	N/A	not informed	Conde	Jacumã	saidas_5_8_NOV
8	2018-11-05	09:43:00	1	"tartaruga"	Turtle	N/A	not informed	Conde	Jacumã	saidas_5_8_NOV
8	2018-11-05	09:47:00	1	"tartaruga"	Turtle	N/A	not informed	Conde	Jacumã	saidas_5_8_NOV
4	2018-11-06	09:18:00	1	"tartaruga"	Turtle	N/A	not informed	João Pessoa	Penha	saidas_5_8_NOV
4	2018-11-06	09:20:00	1	"tartaruga"	Turtle	N/A	not informed	João Pessoa	Penha	saidas_5_8_NOV
4	2018-11-06	09:23:00	1	"tartaruga"	Turtle	N/A	juvenile	João Pessoa	Penha	saidas_5_8_NOV
4	2018-11-06	09:25:00	1	"tartaruga"	Turtle	N/A	not informed	João Pessoa	Penha	saidas_5_8_NOV
4	2018-11-06	09:28:00	1	"tartaruga"	Turtle	N/A	not informed	João Pessoa	Penha	saidas_5_8_NOV
3	2018-11-08	09:10:00	2	"tartaruga"	Turtle	N/A	not informed	Cabedelo	Ponta de Matos	saidas_5_8_NOV
3	2018-11-08	09:11:00	1	"tartaruga"	Turtle	N/A	not informed	Cabedelo	Ponta de Matos	saidas_5_8_NOV
3	2018-11-08	09:13:00	1	"tartaruga"	Turtle	N/A	not informed	Cabedelo	Ponta de Matos	saidas_5_8_NOV
3	2018-11-08	09:16:00	2	"tartaruga"	Turtle	N/A	not informed	Cabedelo	Ponta de Matos	saidas_5_8_NOV
3	2018-11-08	09:20:00	1	"tartaruga"	Turtle	N/A	not informed	Cabedelo	Ponta de Matos	saidas_5_8_NOV

## Sheet: Questionnaires
Fisher	City	Is fishing your only source of income?	Vessel type	Fishing gear	Target species / local name	Fishing time	Fishing frequency	Correspondence between folk and scientific taxonomy
1	Cabedelo	no	canoe	gillnet	Seomberomorus brasiliensis / serra; Selar crumenophthalmus / chicharro; Scomberomorus cavala / cavala	few hours in a day	daily	8
2	Cabedelo	no	motorboat	gillnet	Mugil curema / tainha; Centropomus undecimalis / camurim; Lutjanus analis / cioba	2 or 3 days at sea	weekly	7
3	Cabedelo	yes	raft	gillnet, hook and line	Selar crumenophthalmus / chicharro; Lutjanus analis / cioba; Scomberomorus cavala / cavala	few hours in a day	daily	N/A
4	João Pessoa	no	raft	gillnet	Lutjanus analis / cioba; Cynoscion acoupa / pescada; Centropomus undecimalis / robalo	few hours in a day	daily	N/A
5	João Pessoa	yes	raft	gillnet	Centropomus undecimalis / camurim; Caranx latus / xaréu	few hours in a day	daily	7
6	João Pessoa	yes	raft	gillnet	Centropomus undecimalis / camurim; Cynoscion acoupa / pescada	few hours in a day	daily	8
7	Conde	yes	motorboat	gillnet	Seomberomorus brasiliensis / serra; Selar crumenophthalmus / chicharro	2 or 3 days at sea	weekly	5
8	Conde	yes	motorboat	gillnet	Selar crumenophthalmus / chicharro; Lutjanus synagris /ariocó	2 or 3 days at sea	weekly	4
9	Conde	yes	motorboat	gillnet	Lutjanus analis / cioba; Scomberomorus cavala / cavala; Mugil curema / tainha	2 or 3 days at sea	weekly	N/A

## Sheet: Fishing intensity
ID*	Number of vessel routes	Log-transformed data		*Spatially correlated pixel
21	0	1
22	0	1
100	0	1
101	0	1
102	0	1
178	0	1
179	0	1
180	0	1
181	0	1
182	0	1
183	0	1
258	1	2
259	0	1
260	1	2
261	0	1
262	0	1
263	0	1
266	0	1
267	0	1
268	0	1
338	0	1
339	1	2
340	3	4
341	4	5
342	1	2
343	1	2
344	1	2
347	0	1
348	2	3
349	1	2
350	0	1
418	0	1
419	1	2
420	56	57
421	0	1
422	0	1
423	2	3
424	1	2
427	1	2
428	1	2
429	4	5
430	3	4
431	0	1
432	0	1
433	0	1
434	0	1
499	0	1
500	1	2
501	48	49
502	1	2
503	0	1
504	0	1
505	0	1
506	0	1
507	0	1
508	0	1
509	2	3
510	2	3
511	0	1
512	0	1
513	2	3
514	2	3
515	2	3
516	0	1
578	0	1
579	0	1
580	2	3
581	9	10
582	6	7
583	0	1
584	0	1
585	0	1
586	0	1
587	0	1
588	0	1
589	0	1
590	0	1
591	0	1
592	0	1
593	0	1
594	0	1
595	0	1
596	0	1
597	0	1
598	2	3
599	0	1
659	0	1
660	0	1
661	2	3
662	5	6
663	6	7
664	1	2
665	2	3
666	0	1
667	0	1
668	0	1
669	0	1
670	0	1
671	0	1
672	0	1
673	0	1
674	0	1
675	0	1
676	0	1
677	0	1
678	0	1
679	0	1
680	2	3
681	0	1
739	1	2
740	1	2
741	2	3
742	2	3
743	1	2
744	3	4
745	3	4
746	2	3
747	0	1
748	0	1
749	0	1
750	0	1
751	0	1
752	0	1
753	0	1
754	0	1
755	0	1
756	0	1
757	0	1
758	0	1
759	0	1
760	2	3
761	2	3
762	0	1
792	0	1
793	0	1
796	0	1
797	0	1
798	0	1
799	0	1
819	0	1
820	0	1
821	0	1
822	2	3
823	1	2
824	1	2
825	1	2
826	0	1
827	1	2
828	0	1
829	0	1
830	0	1
831	0	1
832	0	1
833	0	1
834	0	1
835	0	1
836	0	1
837	0	1
838	0	1
839	0	1
840	0	1
841	0	1
842	0	1
843	3	4
844	0	1
853	0	1
854	0	1
870	0	1
871	0	1
872	0	1
873	0	1
874	0	1
875	0	1
876	0	1
877	0	1
878	0	1
879	0	1
880	0	1
881	0	1
882	0	1
899	1	2
900	2	3
901	1	2
902	2	3
903	1	2
904	3	4
905	2	3
906	1	2
907	0	1
908	0	1
909	0	1
910	0	1
911	0	1
912	0	1
913	0	1
914	0	1
915	0	1
916	0	1
917	0	1
918	0	1
919	0	1
920	0	1
921	0	1
922	0	1
923	0	1
924	4	5
930	0	1
931	0	1
932	0	1
933	0	1
934	0	1
935	0	1
936	0	1
937	0	1
939	0	1
941	0	1
947	0	1
948	0	1
949	0	1
950	0	1
951	0	1
952	0	1
953	0	1
954	0	1
955	0	1
956	0	1
957	3	4
958	1	2
959	1	2
960	1	2
961	0	1
962	0	1
963	0	1
964	1	2
965	1	2
980	1	2
981	1	2
982	0	1
983	1	2
984	0	1
985	3	4
986	0	1
987	1	2
988	0	1
989	1	2
990	0	1
991	0	1
992	0	1
993	0	1
994	0	1
995	0	1
996	0	1
997	0	1
998	0	1
999	0	1
1000	0	1
1001	0	1
1002	0	1
1003	0	1
1004	0	1
1005	5	6
1006	0	1
1008	0	1
1009	0	1
1010	0	1
1011	0	1
1012	0	1
1013	0	1
1014	0	1
1015	0	1
1016	0	1
1017	0	1
1018	0	1
1019	0	1
1020	71	72
1021	12	13
1022	0	1
1023	0	1
1024	0	1
1025	0	1
1026	0	1
1027	0	1
1028	0	1
1029	0	1
1030	0	1
1031	0	1
1032	0	1
1033	0	1
1034	0	1
1035	0	1
1036	1	2
1037	1	2
1038	1	2
1039	1	2
1040	0	1
1041	0	1
1042	1	2
1043	1	2
1044	1	2
1045	1	2
1046	0	1
1047	0	1
1060	1	2
1061	1	2
1062	0	1
1063	1	2
1064	0	1
1065	1	2
1066	1	2
1067	1	2
1068	1	2
1069	0	1
1070	1	2
1071	0	1
1072	0	1
1073	0	1
1074	0	1
1075	0	1
1076	0	1
1077	0	1
1078	0	1
1079	0	1
1080	0	1
1081	0	1
1082	0	1
1083	0	1
1084	0	1
1085	0	1
1086	9	10
1087	5	6
1088	45	46
1089	10	11
1090	2	3
1091	0	1
1092	0	1
1093	0	1
1094	0	1
1095	0	1
1096	0	1
1097	0	1
1098	0	1
1099	3	4
1100	8	9
1101	20	21
1102	10	11
1103	2	3
1104	2	3
1105	1	2
1106	0	1
1107	0	1
1108	0	1
1109	0	1
1110	0	1
1111	0	1
1112	1	2
1113	1	2
1114	1	2
1115	1	2
1116	1	2
1117	0	1
1118	0	1
1119	0	1
1120	1	2
1121	0	1
1122	0	1
1123	0	1
1124	0	1
1125	0	1
1126	0	1
1127	0	1
1128	1	2
1129	1	2
1141	0	1
1142	0	1
1143	0	1
1144	0	1
1145	0	1
1146	2	3
1147	2	3
1148	0	1
1149	1	2
1150	1	2
1151	0	1
1152	0	1
1153	0	1
1154	0	1
1155	0	1
1156	0	1
1157	0	1
1158	0	1
1159	0	1
1160	0	1
1161	0	1
1162	0	1
1163	0	1
1164	0	1
1165	0	1
1166	0	1
1167	0	1
1168	4	5
1169	8	9
1170	8	9
1171	1	2
1172	0	1
1173	0	1
1174	0	1
1175	0	1
1176	0	1
1177	0	1
1178	0	1
1179	0	1
1180	0	1
1181	0	1
1182	0	1
1183	5	6
1184	16	17
1185	7	8
1186	2	3
1187	3	4
1188	3	4
1189	2	3
1190	2	3
1191	2	3
1192	2	3
1193	1	2
1194	0	1
1195	0	1
1196	0	1
1197	0	1
1198	0	1
1199	0	1
1200	0	1
1201	0	1
1202	2	3
1203	2	3
1204	0	1
1205	0	1
1206	0	1
1207	0	1
1208	0	1
1209	0	1
1210	0	1
1211	1	2
1212	1	2
1220	0	1
1221	1	2
1222	0	1
1223	1	2
1224	1	2
1225	0	1
1226	1	2
1227	2	3
1228	1	2
1229	1	2
1230	0	1
1231	1	2
1232	1	2
1233	0	1
1234	0	1
1235	0	1
1236	0	1
1237	0	1
1238	0	1
1239	0	1
1240	0	1
1241	0	1
1242	0	1
1243	0	1
1244	0	1
1245	0	1
1246	0	1
1247	0	1
1248	0	1
1249	3	4
1250	3	4
1251	7	8
1252	0	1
1253	0	1
1254	0	1
1255	0	1
1256	0	1
1257	0	1
1258	0	1
1259	0	1
1260	0	1
1261	2	3
1262	1	2
1263	0	1
1264	0	1
1265	6	7
1266	8	9
1267	1	2
1268	0	1
1269	1	2
1270	1	2
1271	0	1
1272	0	1
1273	1	2
1274	1	2
1275	1	2
1276	1	2
1277	1	2
1278	0	1
1279	0	1
1280	0	1
1281	0	1
1282	0	1
1283	0	1
1284	2	3
1285	2	3
1286	0	1
1287	0	1
1288	0	1
1289	0	1
1290	0	1
1291	0	1
1292	0	1
1293	2	3
1301	0	1
1302	1	2
1303	0	1
1304	1	2
1305	0	1
1306	0	1
1307	0	1
1308	2	3
1309	0	1
1310	0	1
1311	1	2
1312	0	1
1313	0	1
1314	0	1
1315	0	1
1316	0	1
1317	0	1
1318	0	1
1319	0	1
1320	0	1
1321	0	1
1322	0	1
1323	0	1
1324	0	1
1325	0	1
1326	0	1
1327	0	1
1328	2	3
1329	0	1
1330	2	3
1331	1	2
1332	2	3
1333	2	3
1334	0	1
1335	0	1
1336	0	1
1337	0	1
1338	0	1
1339	0	1
1340	0	1
1341	0	1
1342	1	2
1343	1	2
1344	0	1
1345	0	1
1346	0	1
1347	5	6
1348	5	6
1349	3	4
1350	1	2
1351	0	1
1352	1	2
1353	0	1
1354	0	1
1355	0	1
1356	0	1
1357	1	2
1358	0	1
1359	1	2
1360	1	2
1361	1	2
1362	0	1
1363	0	1
1364	0	1
1365	0	1
1366	0	1
1367	2	3
1368	4	5
1369	1	2
1370	0	1
1371	0	1
1372	1	2
1373	0	1
1374	0	1
1375	0	1
1381	1	2
1382	1	2
1383	0	1
1384	0	1
1385	0	1
1386	1	2
1387	0	1
1388	1	2
1389	1	2
1390	1	2
1391	1	2
1392	0	1
1393	0	1
1394	0	1
1395	1	2
1396	0	1
1397	0	1
1398	0	1
1399	0	1
1400	0	1
1401	0	1
1402	0	1
1403	0	1
1404	0	1
1405	0	1
1406	0	1
1407	0	1
1408	0	1
1409	1	2
1410	2	3
1411	1	2
1412	3	4
1413	0	1
1414	0	1
1415	0	1
1416	0	1
1417	0	1
1418	0	1
1419	0	1
1420	0	1
1421	0	1
1422	1	2
1423	1	2
1424	1	2
1425	0	1
1426	0	1
1427	0	1
1428	3	4
1429	1	2
1430	2	3
1431	1	2
1432	1	2
1433	0	1
1434	1	2
1435	1	2
1436	0	1
1437	0	1
1438	1	2
1439	0	1
1440	0	1
1441	0	1
1442	1	2
1443	1	2
1444	1	2
1445	0	1
1446	0	1
1447	0	1
1448	0	1
1449	1	2
1450	1	2
1451	1	2
1452	2	3
1453	1	2
1454	0	1
1455	2	3
1456	3	4
1462	0	1
1463	0	1
1464	0	1
1465	0	1
1466	1	2
1467	1	2
1468	0	1
1469	2	3
1470	1	2
1471	1	2
1472	0	1
1473	1	2
1474	0	1
1475	1	2
1476	0	1
1477	1	2
1478	0	1
1479	0	1
1480	0	1
1481	0	1
1482	0	1
1483	0	1
1484	0	1
1485	0	1
1486	0	1
1487	0	1
1488	0	1
1489	0	1
1490	1	2
1491	3	4
1492	0	1
1493	0	1
1494	1	2
1495	0	1
1496	0	1
1497	0	1
1498	0	1
1499	0	1
1500	0	1
1501	0	1
1502	0	1
1503	0	1
1504	0	1
1505	1	2
1506	0	1
1507	0	1
1508	0	1
1509	2	3
1510	1	2
1511	2	3
1512	1	2
1513	1	2
1514	2	3
1515	1	2
1516	0	1
1517	1	2
1518	1	2
1519	1	2
1520	3	4
1521	2	3
1522	0	1
1523	0	1
1524	0	1
1525	0	1
1526	0	1
1527	0	1
1528	0	1
1529	0	1
1530	0	1
1531	1	2
1532	1	2
1533	1	2
1534	1	2
1535	2	3
1536	4	5
1537	0	1
1538	1	2
1542	1	2
1543	0	1
1544	0	1
1545	0	1
1546	0	1
1547	0	1
1548	0	1
1549	1	2
1550	1	2
1551	1	2
1552	0	1
1553	1	2
1554	1	2
1555	0	1
1556	1	2
1557	0	1
1558	0	1
1559	0	1
1560	0	1
1561	0	1
1562	0	1
1563	0	1
1564	0	1
1565	0	1
1566	0	1
1567	0	1
1568	0	1
1569	0	1
1570	1	2
1571	3	4
1572	0	1
1573	2	3
1574	1	2
1575	1	2
1576	0	1
1577	0	1
1578	0	1
1579	0	1
1580	0	1
1581	0	1
1582	0	1
1583	0	1
1584	1	2
1585	3	4
1586	0	1
1587	0	1
1588	0	1
1589	0	1
1590	3	4
1591	4	5
1592	3	4
1593	1	2
1594	4	5
1595	2	3
1596	1	2
1597	1	2
1598	1	2
1599	2	3
1600	3	4
1601	6	7
1602	1	2
1603	0	1
1604	0	1
1605	0	1
1606	0	1
1607	1	2
1608	0	1
1609	0	1
1610	0	1
1611	0	1
1612	0	1
1613	0	1
1614	0	1
1615	1	2
1616	0	1
1617	2	3
1618	1	2
1619	1	2
1622	0	1
1623	1	2
1624	0	1
1625	0	1
1626	0	1
1627	0	1
1628	2	3
1629	1	2
1630	1	2
1631	2	3
1632	0	1
1633	0	1
1634	1	2
1635	0	1
1636	0	1
1637	0	1
1638	1	2
1639	1	2
1640	0	1
1641	0	1
1642	0	1
1643	0	1
1644	0	1
1645	0	1
1646	0	1
1647	0	1
1648	0	1
1649	0	1
1650	0	1
1651	0	1
1652	2	3
1653	0	1
1654	5	6
1655	1	2
1656	0	1
1657	0	1
1658	0	1
1659	0	1
1660	0	1
1661	0	1
1662	0	1
1663	0	1
1664	1	2
1665	0	1
1666	1	2
1667	0	1
1668	0	1
1669	0	1
1670	0	1
1671	1	2
1672	4	5
1673	3	4
1674	2	3
1675	0	1
1676	1	2
1677	1	2
1678	1	2
1679	1	2
1680	1	2
1681	2	3
1682	1	2
1683	2	3
1684	2	3
1685	1	2
1686	0	1
1687	0	1
1688	0	1
1689	1	2
1690	1	2
1691	0	1
1692	0	1
1693	0	1
1694	2	3
1695	1	2
1696	0	1
1697	0	1
1698	1	2
1699	1	2
1700	1	2
1702	0	1
1703	1	2
1704	0	1
1705	0	1
1706	0	1
1707	0	1
1708	1	2
1709	1	2
1710	0	1
1711	1	2
1712	1	2
1713	1	2
1714	0	1
1715	0	1
1716	1	2
1717	0	1
1718	0	1
1719	0	1
1720	1	2
1721	0	1
1722	0	1
1723	0	1
1724	0	1
1725	0	1
1726	0	1
1727	0	1
1728	0	1
1729	0	1
1730	0	1
1731	0	1
1732	1	2
1733	1	2
1734	1	2
1735	0	1
1736	0	1
1737	1	2
1738	0	1
1739	0	1
1740	0	1
1741	0	1
1742	0	1
1743	0	1
1744	0	1
1745	2	3
1746	0	1
1747	2	3
1748	0	1
1749	0	1
1750	0	1
1751	0	1
1752	4	5
1753	2	3
1754	3	4
1755	1	2
1756	0	1
1757	1	2
1758	1	2
1759	1	2
1760	1	2
1761	2	3
1762	1	2
1763	5	6
1764	4	5
1765	4	5
1766	3	4
1767	0	1
1768	0	1
1769	0	1
1770	0	1
1771	1	2
1772	1	2
1773	1	2
1774	1	2
1775	2	3
1776	0	1
1777	1	2
1778	0	1
1779	0	1
1780	0	1
1781	0	1
1783	0	1
1784	1	2
1785	0	1
1786	0	1
1787	0	1
1788	0	1
1789	2	3
1790	1	2
1791	0	1
1792	1	2
1793	2	3
1794	0	1
1795	0	1
1796	1	2
1797	0	1
1798	0	1
1799	0	1
1800	1	2
1801	0	1
1802	0	1
1803	0	1
1804	0	1
1805	0	1
1806	0	1
1807	0	1
1808	0	1
1809	0	1
1810	0	1
1811	0	1
1812	0	1
1813	0	1
1814	0	1
1815	1	2
1816	0	1
1817	0	1
1818	0	1
1819	0	1
1820	0	1
1821	0	1
1822	0	1
1823	0	1
1824	0	1
1825	3	4
1826	0	1
1827	3	4
1828	2	3
1829	0	1
1830	0	1
1831	0	1
1832	0	1
1833	1	2
1834	4	5
1835	2	3
1836	1	2
1837	0	1
1838	0	1
1839	1	2
1840	0	1
1841	4	5
1842	1	2
1843	0	1
1844	1	2
1845	1	2
1846	1	2
1847	0	1
1848	0	1
1849	0	1
1850	0	1
1851	0	1
1852	0	1
1853	0	1
1854	0	1
1855	0	1
1856	0	1
1857	1	2
1858	1	2
1859	0	1
1860	0	1
1861	0	1
1862	0	1
1864	0	1
1865	0	1
1866	0	1
1867	0	1
1868	1	2
1869	2	3
1870	0	1
1871	0	1
1872	0	1
1873	1	2
1874	1	2
1875	0	1
1876	1	2
1877	0	1
1878	1	2
1879	0	1
1880	0	1
1881	1	2
1882	1	2
1883	0	1
1884	0	1
1885	0	1
1886	0	1
1887	0	1
1888	0	1
1889	0	1
1890	0	1
1891	0	1
1892	0	1
1893	0	1
1894	1	2
1895	0	1
1896	0	1
1897	0	1
1898	1	2
1899	2	3
1900	0	1
1901	0	1
1902	0	1
1903	0	1
1904	0	1
1905	0	1
1906	1	2
1907	3	4
1908	5	6
1909	1	2
1910	0	1
1911	0	1
1912	0	1
1913	0	1
1914	2	3
1915	6	7
1916	4	5
1917	0	1
1918	1	2
1919	0	1
1920	3	4
1921	0	1
1922	2	3
1923	0	1
1924	0	1
1925	0	1
1926	1	2
1927	1	2
1928	0	1
1929	1	2
1930	0	1
1931	0	1
1932	0	1
1933	0	1
1934	0	1
1935	0	1
1936	0	1
1937	0	1
1938	0	1
1939	0	1
1940	0	1
1941	0	1
1942	0	1
1945	3	4
1946	1	2
1947	0	1
1948	0	1
1949	0	1
1950	0	1
1951	0	1
1952	1	2
1953	1	2
1954	0	1
1955	2	3
1956	0	1
1957	1	2
1958	0	1
1959	1	2
1960	0	1
1961	0	1
1962	0	1
1963	0	1
1964	0	1
1965	0	1
1966	0	1
1967	0	1
1968	0	1
1969	0	1
1970	0	1
1971	0	1
1972	0	1
1973	0	1
1974	0	1
1975	0	1
1976	0	1
1977	1	2
1978	0	1
1979	0	1
1980	0	1
1981	1	2
1982	0	1
1983	0	1
1984	0	1
1985	0	1
1986	0	1
1987	0	1
1988	2	3
1989	2	3
1990	4	5
1991	0	1
1992	0	1
1993	0	1
1994	0	1
1995	1	2
1996	0	1
1997	2	3
1998	0	1
1999	1	2
2000	1	2
2001	0	1
2002	0	1
2003	1	2
2004	0	1
2005	1	2
2006	0	1
2007	0	1
2008	0	1
2009	1	2
2010	0	1
2011	1	2
2012	0	1
2013	0	1
2014	0	1
2015	0	1
2016	0	1
2017	0	1
2018	0	1
2019	0	1
2020	0	1
2021	0	1
2022	0	1
2023	0	1
2026	0	1
2027	1	2
2028	1	2
2029	0	1
2030	0	1
2031	0	1
2032	0	1
2033	2	3
2034	0	1
2035	2	3
2036	0	1
2037	0	1
2038	0	1
2039	0	1
2040	0	1
2041	0	1
2042	0	1
2043	0	1
2044	1	2
2045	1	2
2046	0	1
2047	0	1
2048	0	1
2049	0	1
2050	0	1
2051	0	1
2052	0	1
2053	0	1
2054	0	1
2055	0	1
2056	0	1
2057	0	1
2058	1	2
2059	1	2
2060	0	1
2061	1	2
2062	1	2
2063	0	1
2064	0	1
2065	0	1
2066	0	1
2067	0	1
2068	1	2
2069	0	1
2070	0	1
2071	1	2
2072	0	1
2073	0	1
2074	0	1
2075	0	1
2076	0	1
2077	0	1
2078	1	2
2079	0	1
2080	1	2
2081	1	2
2082	2	3
2083	1	2
2084	3	4
2085	1	2
2086	1	2
2087	0	1
2088	0	1
2089	5	6
2090	0	1
2091	0	1
2092	1	2
2093	0	1
2094	0	1
2095	0	1
2096	0	1
2097	0	1
2098	0	1
2099	0	1
2100	0	1
2101	0	1
2102	0	1
2103	0	1
2108	0	1
2109	0	1
2110	1	2
2111	1	2
2112	0	1
2113	0	1
2114	0	1
2115	0	1
2116	3	4
2117	0	1
2118	0	1
2119	0	1
2120	0	1
2121	1	2
2122	0	1
2123	0	1
2124	0	1
2125	0	1
2126	1	2
2127	1	2
2128	0	1
2129	0	1
2130	0	1
2131	0	1
2132	0	1
2133	0	1
2134	0	1
2135	0	1
2136	0	1
2137	0	1
2138	2	3
2139	1	2
2140	0	1
2141	0	1
2142	0	1
2143	1	2
2144	0	1
2145	0	1
2146	0	1
2147	2	3
2148	2	3
2149	8	9
2150	0	1
2151	0	1
2152	1	2
2153	0	1
2154	0	1
2155	0	1
2156	0	1
2157	2	3
2158	2	3
2159	3	4
2160	0	1
2161	0	1
2162	0	1
2163	1	2
2164	1	2
2165	0	1
2166	0	1
2167	1	2
2168	1	2
2169	0	1
2170	0	1
2171	2	3
2172	2	3
2173	0	1
2174	0	1
2175	0	1
2176	0	1
2177	0	1
2178	0	1
2179	0	1
2180	0	1
2181	0	1
2182	0	1
2183	0	1
2184	0	1
2189	0	1
2190	0	1
2191	0	1
2192	0	1
2193	0	1
2194	0	1
2195	2	3
2196	1	2
2197	0	1
2198	0	1
2199	1	2
2200	0	1
2201	0	1
2202	0	1
2203	0	1
2204	0	1
2205	0	1
2206	0	1
2207	1	2
2208	0	1
2209	0	1
2210	0	1
2211	0	1
2212	0	1
2213	0	1
2214	0	1
2215	0	1
2216	0	1
2217	0	1
2218	2	3
2219	0	1
2220	0	1
2221	0	1
2222	0	1
2223	0	1
2224	0	1
2225	0	1
2226	0	1
2227	0	1
2228	0	1
2229	1	2
2230	2	3
2231	0	1
2232	1	2
2233	0	1
2234	0	1
2235	0	1
2236	0	1
2237	0	1
2238	0	1
2239	0	1
2240	1	2
2241	0	1
2242	1	2
2243	0	1
2244	0	1
2245	0	1
2246	0	1
2247	1	2
2248	1	2
2249	1	2
2250	1	2
2251	1	2
2252	3	4
2253	3	4
2254	1	2
2255	0	1
2256	0	1
2257	0	1
2258	0	1
2259	0	1
2260	0	1
2261	0	1
2262	0	1
2263	0	1
2264	0	1
2265	0	1
2271	0	1
2272	0	1
2273	1	2
2274	0	1
2275	0	1
2276	1	2
2277	0	1
2278	0	1
2279	0	1
2280	1	2
2281	0	1
2282	0	1
2283	1	2
2284	0	1
2285	0	1
2286	0	1
2287	0	1
2288	0	1
2289	2	3
2290	0	1
2291	0	1
2292	0	1
2293	0	1
2294	0	1
2295	0	1
2296	0	1
2297	0	1
2298	0	1
2299	0	1
2300	0	1
2301	0	1
2302	0	1
2303	0	1
2304	0	1
2305	0	1
2306	0	1
2307	0	1
2308	0	1
2309	0	1
2310	0	1
2311	1	2
2312	1	2
2313	0	1
2314	0	1
2315	0	1
2316	0	1
2317	0	1
2318	0	1
2319	1	2
2320	0	1
2321	0	1
2322	0	1
2323	0	1
2324	1	2
2325	0	1
2326	1	2
2327	0	1
2328	0	1
2329	1	2
2330	2	3
2331	0	1
2332	0	1
2333	0	1
2334	1	2
2335	1	2
2336	1	2
2337	0	1
2338	0	1
2339	0	1
2340	0	1
2341	0	1
2342	0	1
2343	0	1
2344	0	1
2345	0	1
2346	0	1
2351	0	1
2352	0	1
2353	0	1
2354	1	2
2355	0	1
2356	0	1
2357	2	3
2358	3	4
2359	0	1
2360	1	2
2361	0	1
2362	0	1
2363	0	1
2364	1	2
2365	0	1
2366	0	1
2367	0	1
2368	0	1
2369	0	1
2370	1	2
2371	0	1
2372	0	1
2373	0	1
2374	0	1
2375	0	1
2376	0	1
2377	0	1
2378	0	1
2379	0	1
2380	1	2
2381	0	1
2382	0	1
2383	0	1
2384	0	1
2385	0	1
2386	0	1
2387	0	1
2388	0	1
2389	0	1
2390	0	1
2391	0	1
2392	0	1
2393	0	1
2394	1	2
2395	0	1
2396	0	1
2397	0	1
2398	0	1
2399	1	2
2400	0	1
2401	0	1
2402	0	1
2403	0	1
2404	0	1
2405	0	1
2406	0	1
2407	0	1
2408	0	1
2409	0	1
2410	0	1
2411	1	2
2412	2	3
2413	1	2
2414	0	1
2415	1	2
2416	0	1
2417	0	1
2418	0	1
2419	0	1
2420	0	1
2421	0	1
2422	0	1
2423	0	1
2424	0	1
2425	0	1
2426	0	1
2433	0	1
2434	0	1
2435	0	1
2436	0	1
2437	0	1
2438	1	2
2439	1	2
2440	0	1
2441	1	2
2442	0	1
2443	0	1
2444	0	1
2445	0	1
2446	0	1
2447	0	1
2448	0	1
2449	0	1
2450	0	1
2451	0	1
2452	1	2
2453	0	1
2454	0	1
2455	0	1
2456	0	1
2457	0	1
2458	0	1
2459	0	1
2460	0	1
2461	1	2
2462	0	1
2463	0	1
2464	0	1
2465	0	1
2466	0	1
2467	0	1
2468	0	1
2469	0	1
2470	0	1
2471	0	1
2472	0	1
2473	0	1
2474	0	1
2475	1	2
2476	0	1
2477	0	1
2478	0	1
2479	0	1
2480	0	1
2481	0	1
2482	0	1
2483	0	1
2484	0	1
2485	0	1
2486	0	1
2487	1	2
2488	1	2
2489	0	1
2490	0	1
2491	0	1
2492	0	1
2493	1	2
2494	2	3
2495	1	2
2496	1	2
2497	1	2
2498	0	1
2499	1	2
2500	0	1
2501	0	1
2502	0	1
2503	0	1
2504	0	1
2505	0	1
2506	0	1
2507	0	1
2514	0	1
2515	0	1
2516	1	2
2517	0	1
2518	2	3
2519	2	3
2520	1	2
2521	0	1
2522	0	1
2523	0	1
2524	0	1
2525	0	1
2526	1	2
2527	0	1
2528	0	1
2529	0	1
2530	0	1
2531	0	1
2532	1	2
2533	1	2
2534	0	1
2535	0	1
2536	0	1
2537	0	1
2538	0	1
2539	0	1
2540	0	1
2541	0	1
2542	0	1
2543	0	1
2544	0	1
2545	0	1
2546	0	1
2547	0	1
2548	0	1
2549	0	1
2550	0	1
2551	0	1
2552	0	1
2553	0	1
2554	1	2
2555	0	1
2556	2	3
2557	0	1
2558	0	1
2559	0	1
2560	0	1
2561	1	2
2562	0	1
2563	0	1
2564	0	1
2565	0	1
2566	0	1
2567	0	1
2568	1	2
2569	1	2
2570	0	1
2571	0	1
2572	0	1
2573	0	1
2574	1	2
2575	3	4
2576	0	1
2577	0	1
2578	1	2
2579	1	2
2580	2	3
2581	1	2
2582	0	1
2583	0	1
2584	0	1
2585	0	1
2586	0	1
2587	0	1
2596	0	1
2597	0	1
2598	0	1
2599	1	2
2600	1	2
2601	1	2
2602	0	1
2603	0	1
2604	0	1
2605	0	1
2606	0	1
2607	0	1
2608	0	1
2609	0	1
2610	0	1
2611	0	1
2612	0	1
2613	0	1
2614	0	1
2615	0	1
2616	0	1
2617	0	1
2618	0	1
2619	0	1
2620	0	1
2621	0	1
2622	0	1
2623	0	1
2624	0	1
2625	0	1
2626	0	1
2627	0	1
2628	0	1
2629	0	1
2630	0	1
2631	0	1
2632	0	1
2633	0	1
2634	0	1
2635	0	1
2636	2	3
2637	4	5
2638	1	2
2639	0	1
2640	0	1
2641	0	1
2642	0	1
2643	0	1
2644	0	1
2645	0	1
2646	0	1
2647	0	1
2648	0	1
2649	0	1
2650	0	1
2651	0	1
2652	0	1
2653	0	1
2654	0	1
2655	0	1
2656	1	2
2657	5	6
2658	0	1
2659	2	3
2660	0	1
2661	0	1
2662	1	2
2663	2	3
2664	1	2
2665	0	1
2666	0	1
2667	0	1
2668	0	1
2669	0	1
2677	0	1
2678	1	2
2679	2	3
2680	0	1
2681	1	2
2682	0	1
2683	1	2
2684	0	1
2685	0	1
2686	0	1
2687	0	1
2688	1	2
2689	0	1
2690	0	1
2691	0	1
2692	0	1
2693	0	1
2694	0	1
2695	2	3
2696	0	1
2697	0	1
2698	0	1
2699	0	1
2700	0	1
2701	0	1
2702	0	1
2703	0	1
2704	0	1
2705	0	1
2706	0	1
2707	0	1
2708	0	1
2709	0	1
2710	0	1
2711	0	1
2712	0	1
2713	0	1
2714	0	1
2715	0	1
2716	0	1
2717	0	1
2718	1	2
2719	0	1
2720	0	1
2721	0	1
2722	0	1
2723	1	2
2724	0	1
2725	0	1
2726	0	1
2727	0	1
2728	0	1
2729	0	1
2730	1	2
2731	1	2
2732	0	1
2733	0	1
2734	0	1
2735	0	1
2736	0	1
2737	1	2
2738	1	2
2739	1	2
2740	3	4
2741	0	1
2742	0	1
2743	0	1
2744	0	1
2745	0	1
2746	0	1
2747	0	1
2748	0	1
2749	0	1
2759	0	1
2760	3	4
2761	1	2
2762	0	1
2763	1	2
2764	1	2
2765	0	1
2766	0	1
2767	0	1
2768	0	1
2769	0	1
2770	0	1
2771	0	1
2772	0	1
2773	0	1
2774	0	1
2775	0	1
2776	2	3
2777	1	2
2778	0	1
2779	0	1
2780	0	1
2781	0	1
2782	0	1
2783	0	1
2784	0	1
2785	0	1
2786	0	1
2787	0	1
2788	0	1
2789	0	1
2790	0	1
2791	0	1
2792	0	1
2793	0	1
2794	0	1
2795	0	1
2796	0	1
2797	0	1
2798	0	1
2799	0	1
2800	0	1
2801	0	1
2802	0	1
2803	0	1
2804	0	1
2805	0	1
2806	0	1
2807	0	1
2808	0	1
2809	0	1
2810	0	1
2811	0	1
2812	1	2
2813	0	1
2814	0	1
2815	0	1
2816	0	1
2817	0	1
2818	0	1
2819	0	1
2820	2	3
2821	2	3
2822	0	1
2823	0	1
2824	0	1
2825	0	1
2826	0	1
2827	0	1
2828	0	1
2829	0	1
2830	0	1
2840	0	1
2841	3	4
2842	1	2
2843	4	5
2844	1	2
2845	0	1
2846	0	1
2847	0	1
2848	0	1
2849	0	1
2850	1	2
2851	0	1
2852	0	1
2853	0	1
2854	0	1
2855	0	1
2856	5	6
2857	0	1
2858	0	1
2859	0	1
2860	0	1
2861	0	1
2862	0	1
2863	0	1
2864	0	1
2865	0	1
[truncated: 849 more rows]
